# Supplementary figures and images for: Corrigendum to “Cytotoxicity and Proapoptotic Effects of Allium atroviolaceum Flower Extract by Modulating Cell Cycle Arrest and Caspase-Dependent and p53-Independent Pathway in Breast Cancer Cell Lines”
Source: Hindawi journal article supplement (doi:10.1155/2021/1759479), 2021-01-28

**a1**

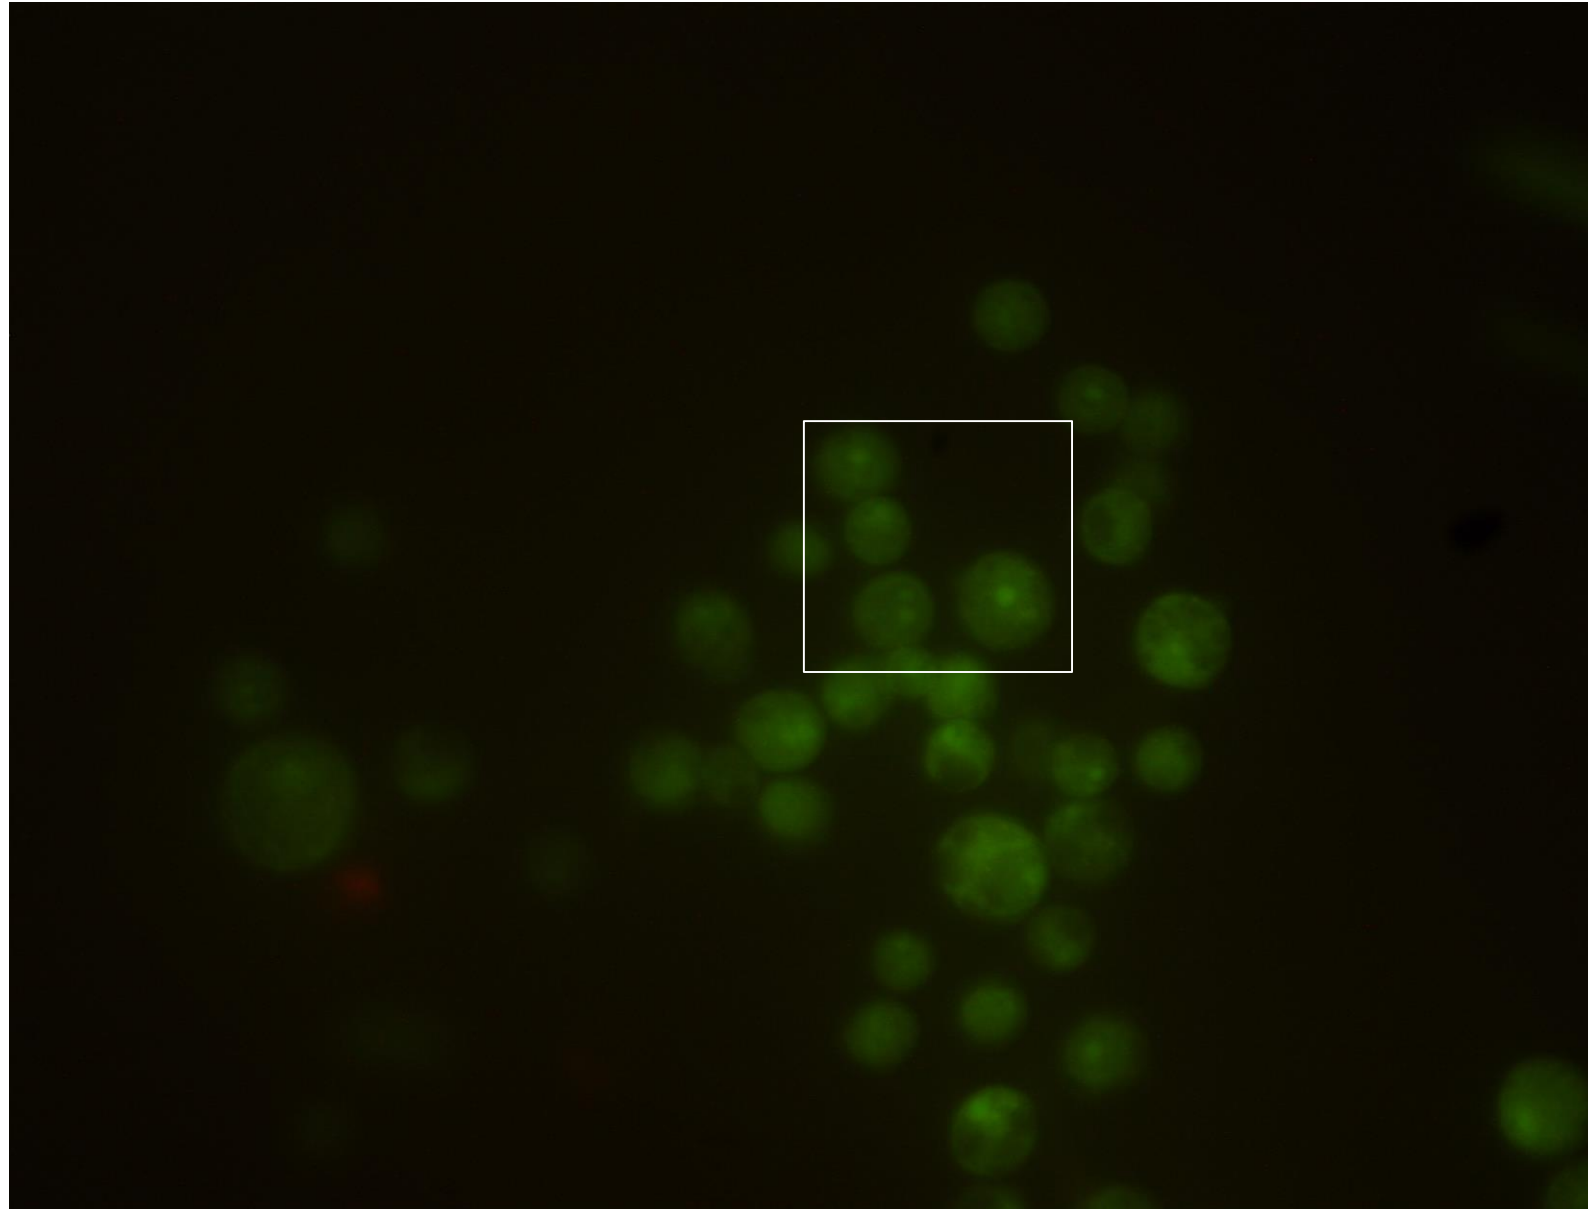

**b1**

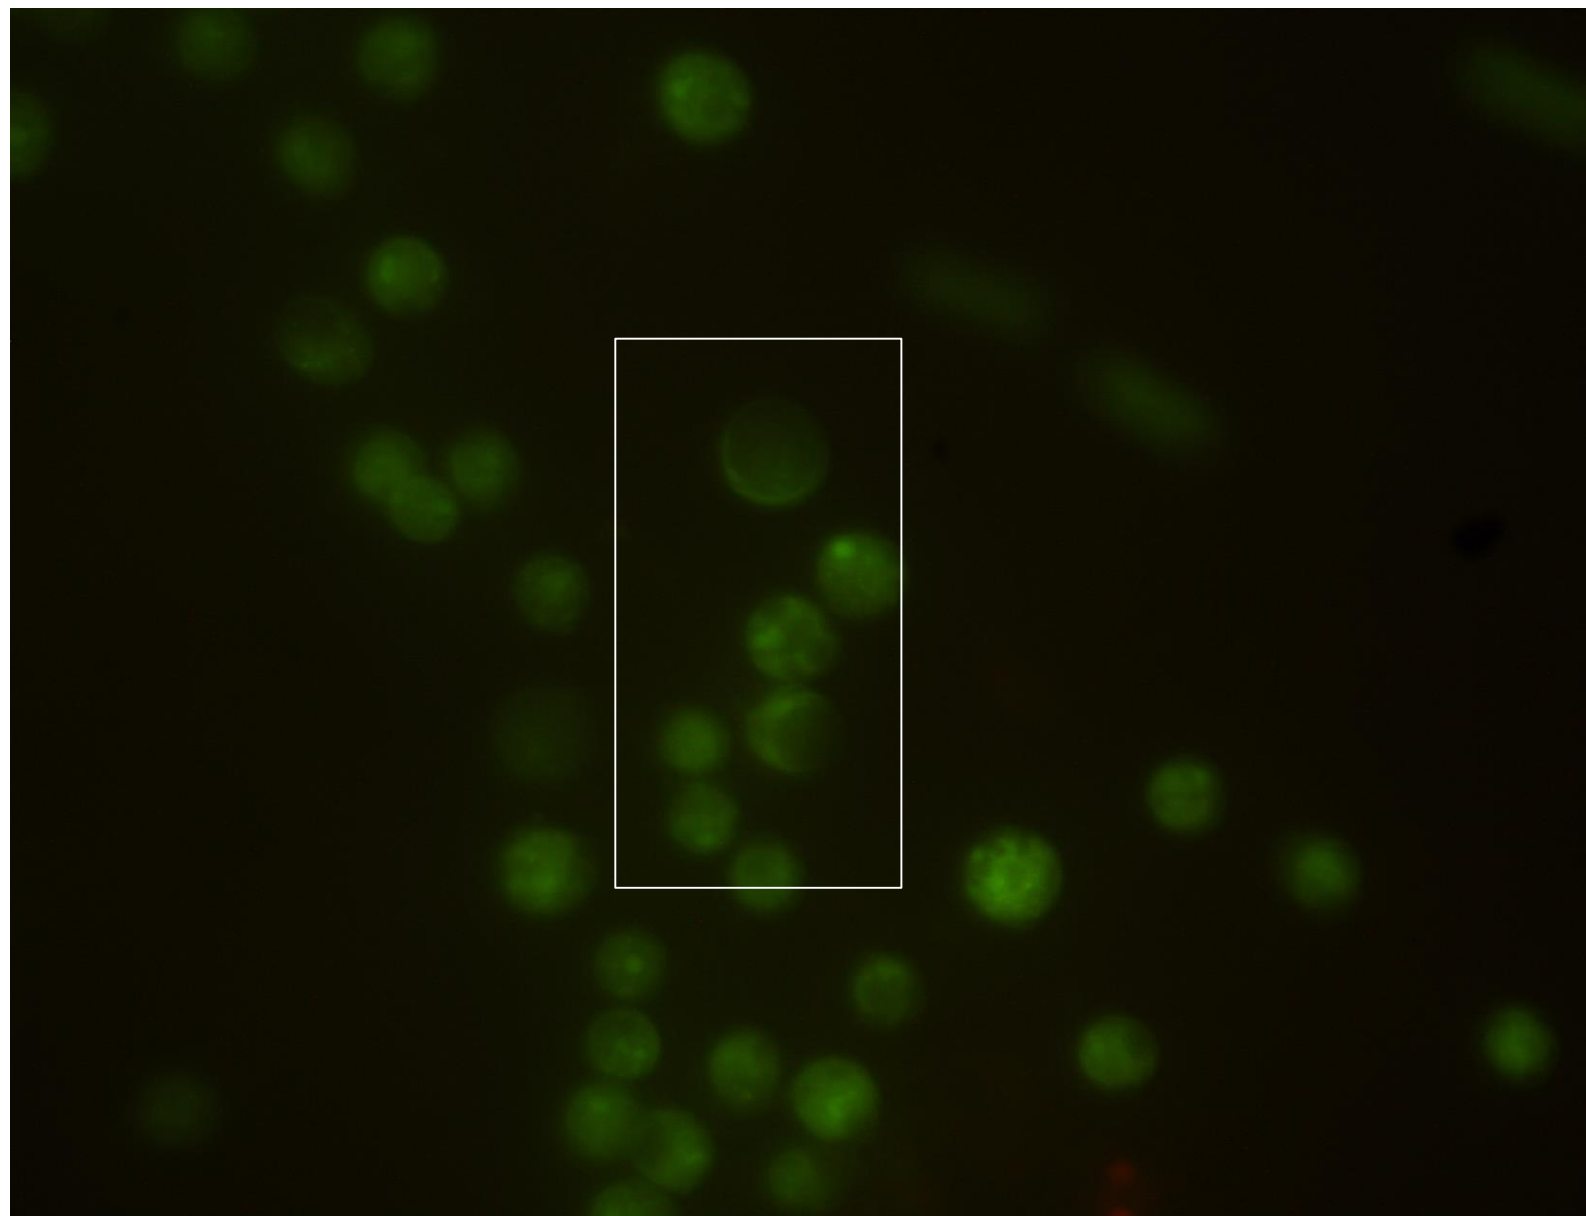

**a3**

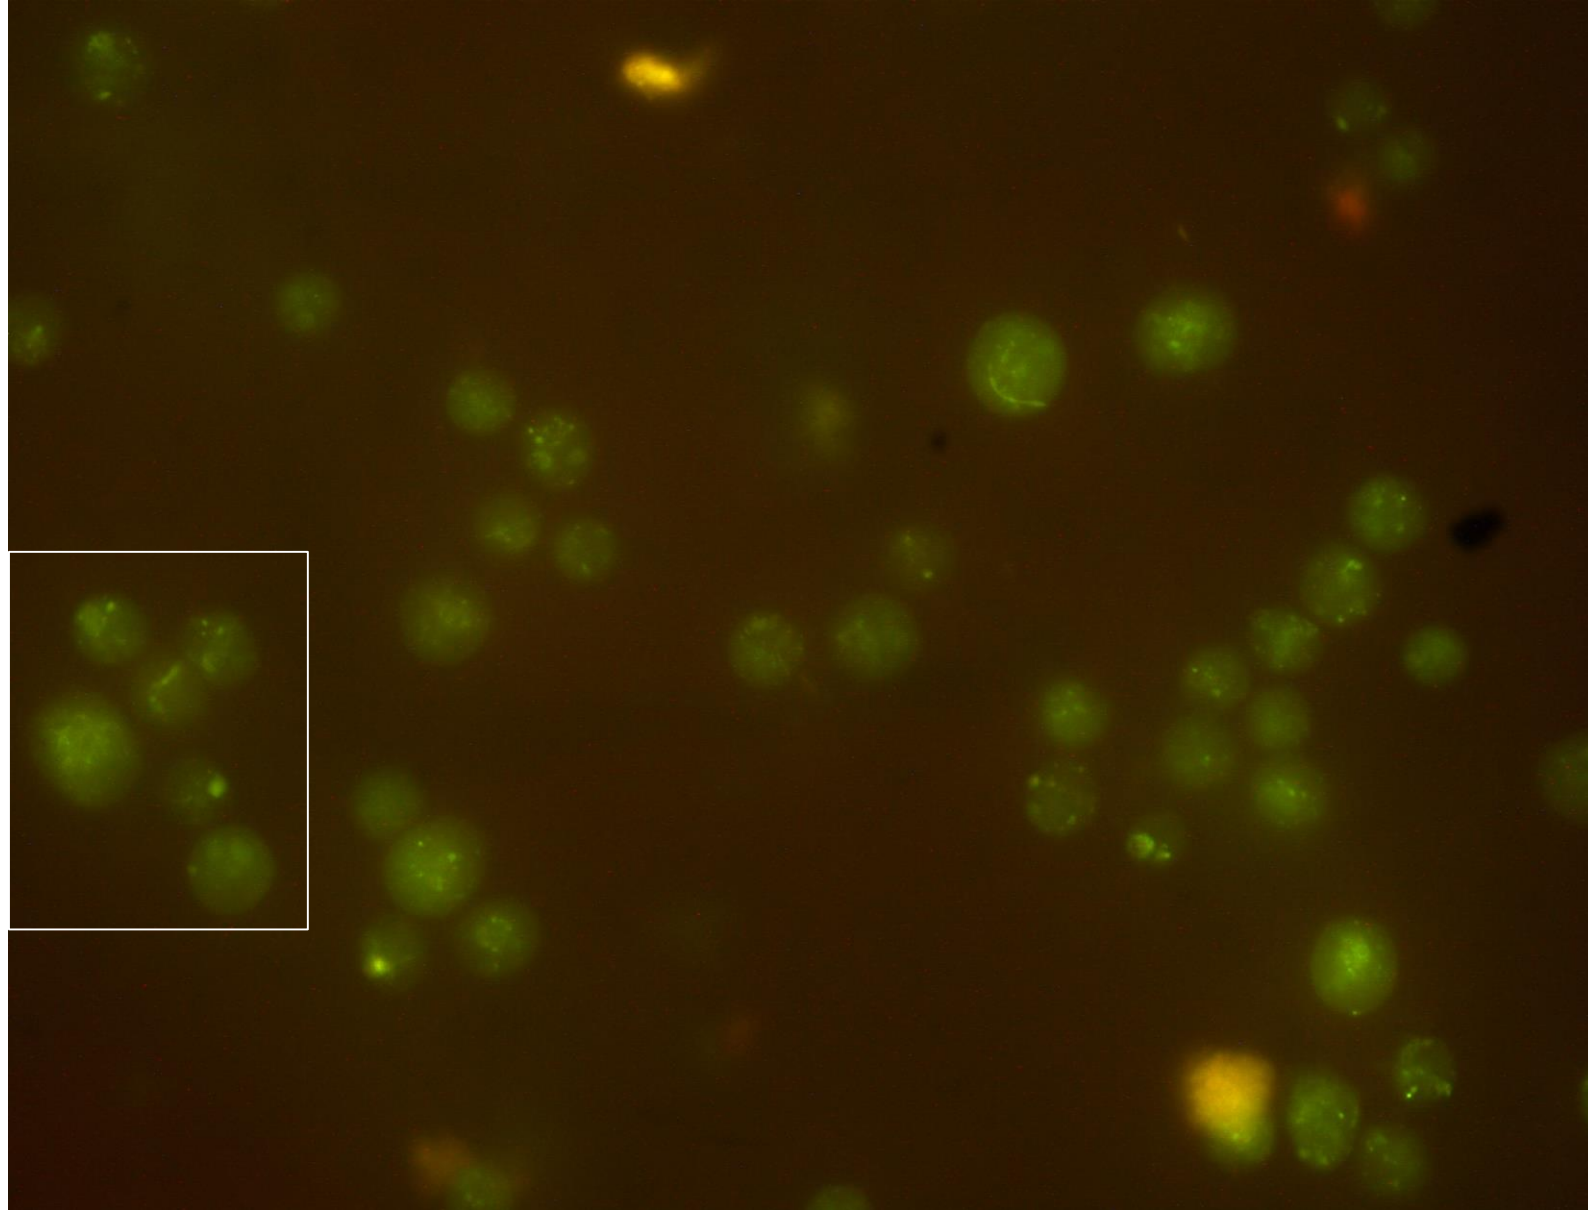

a4

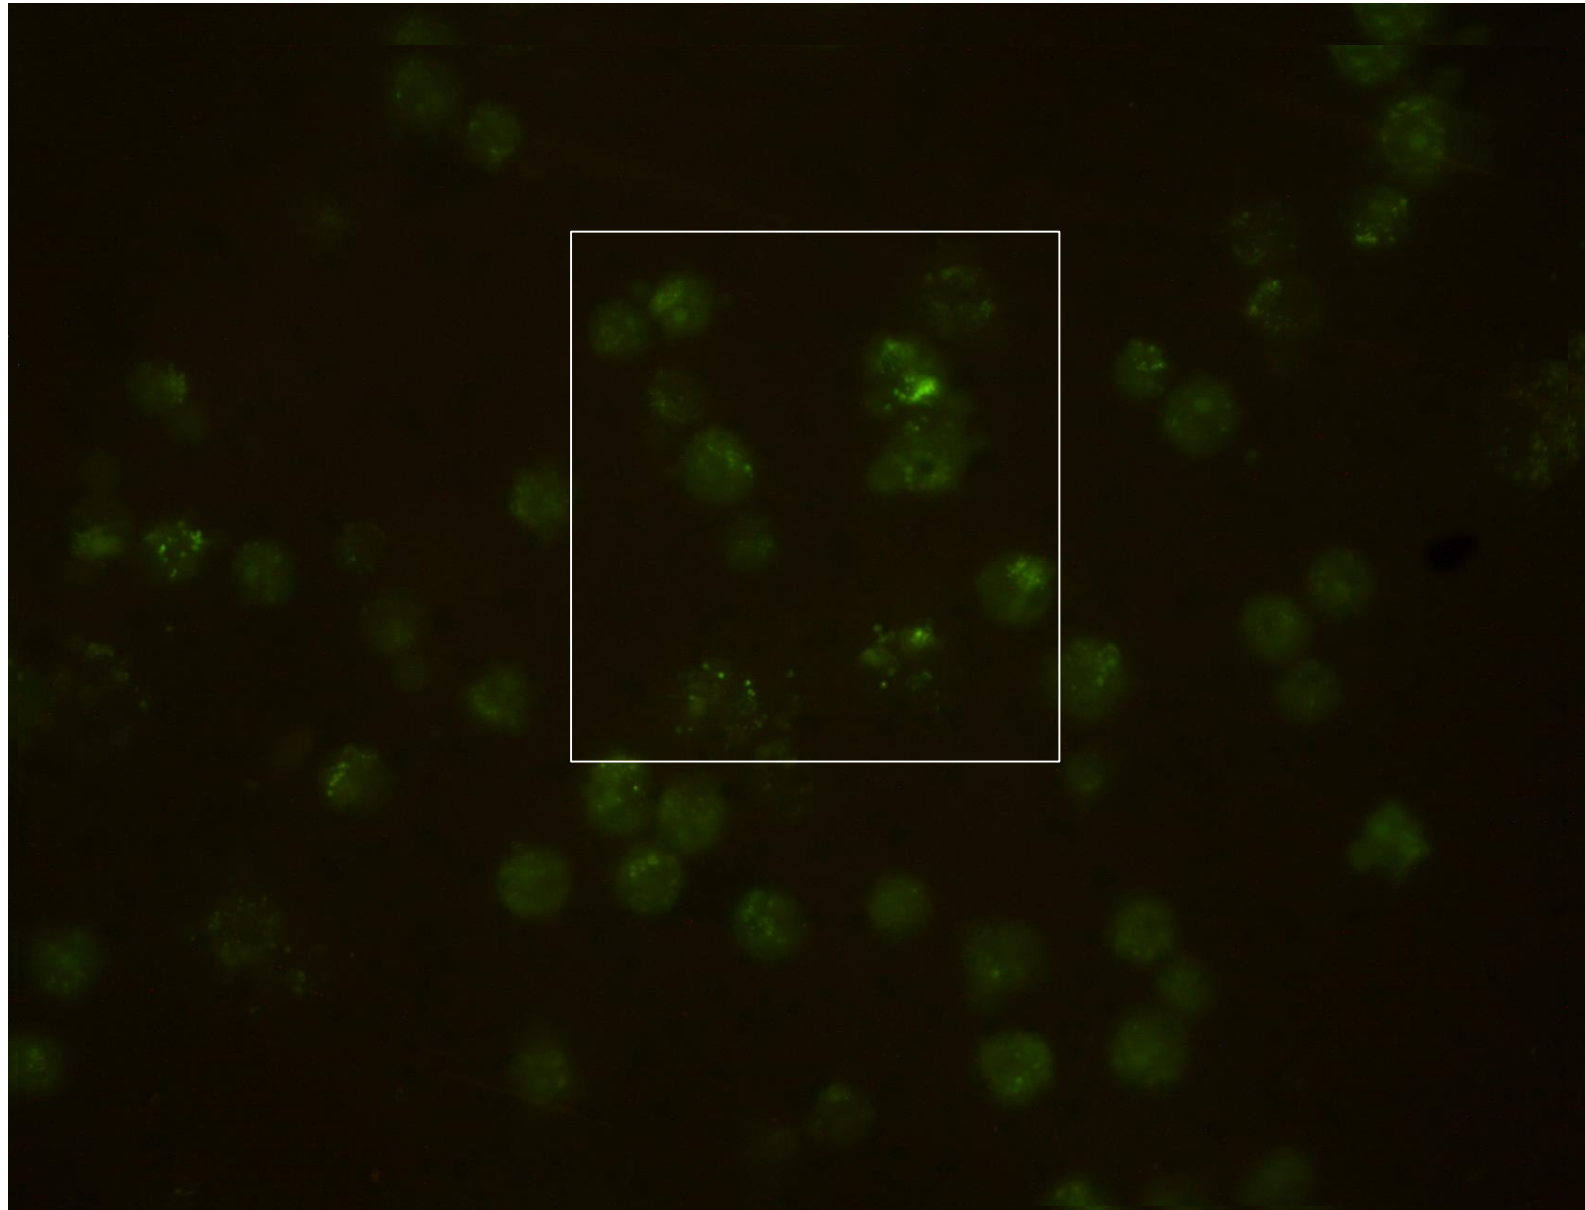

a1'

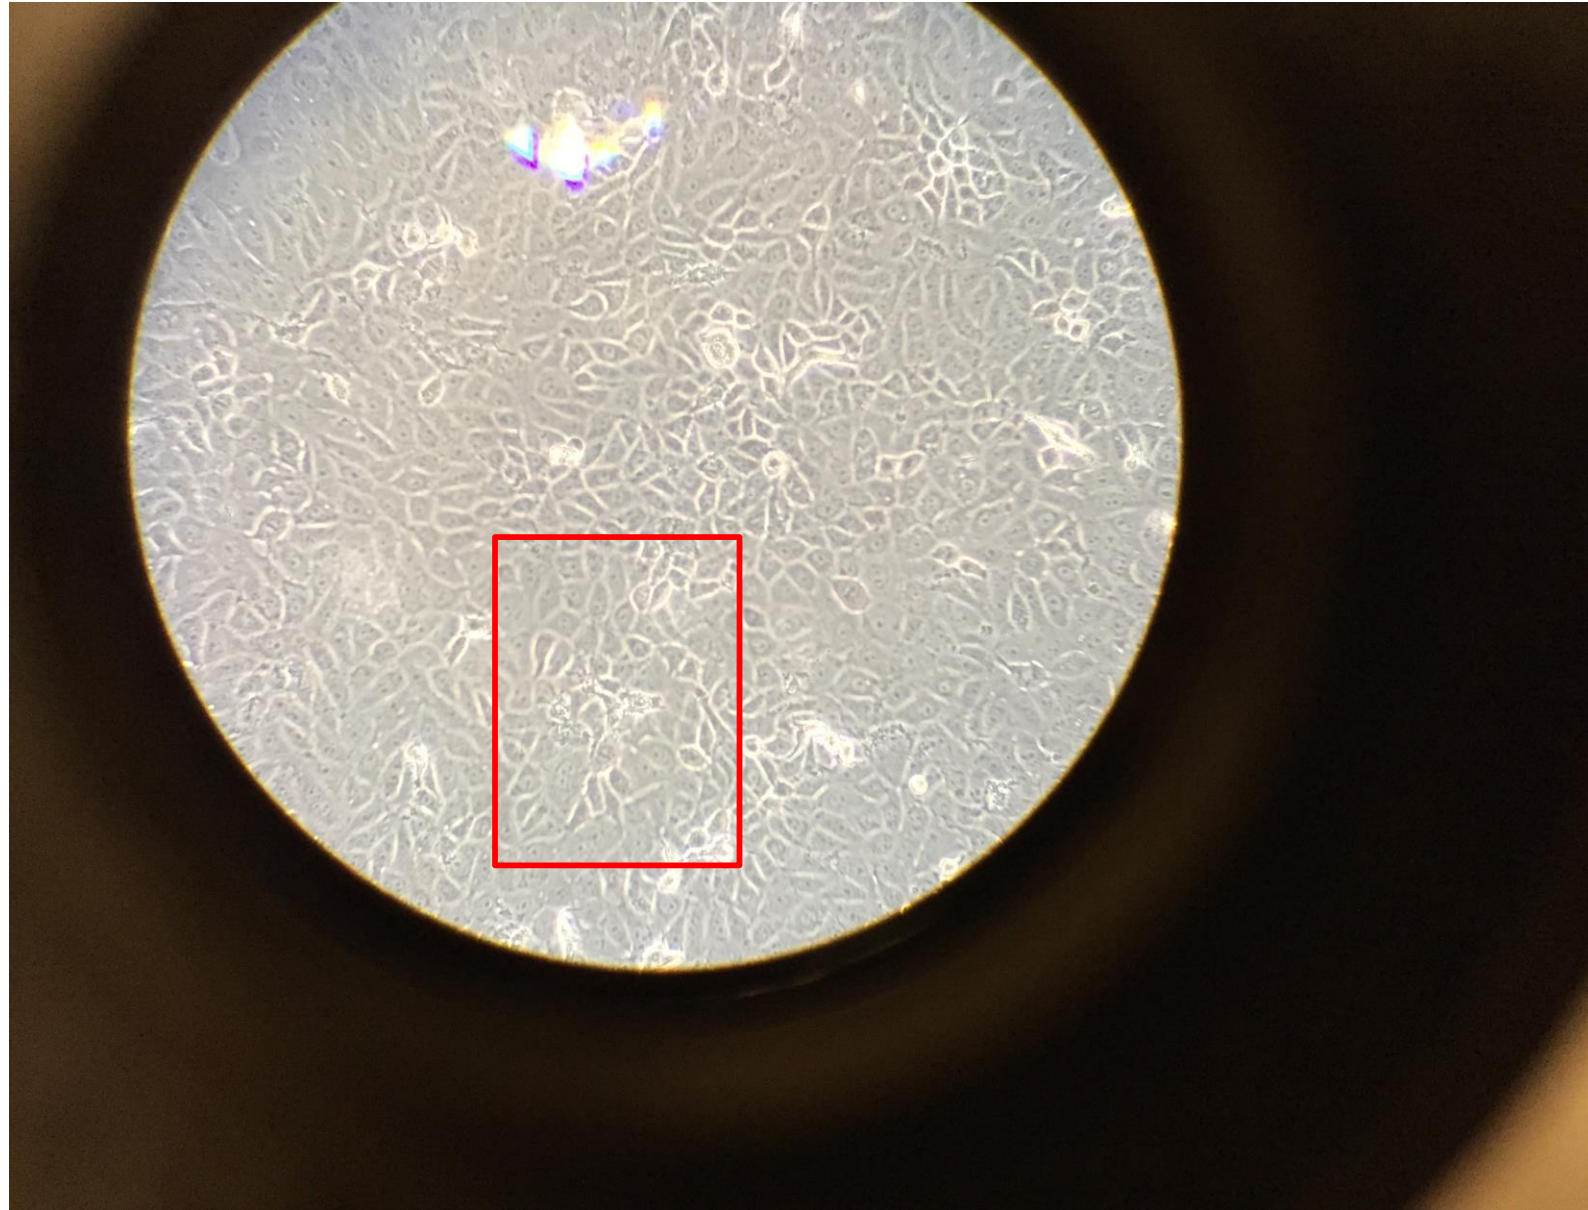

a2'

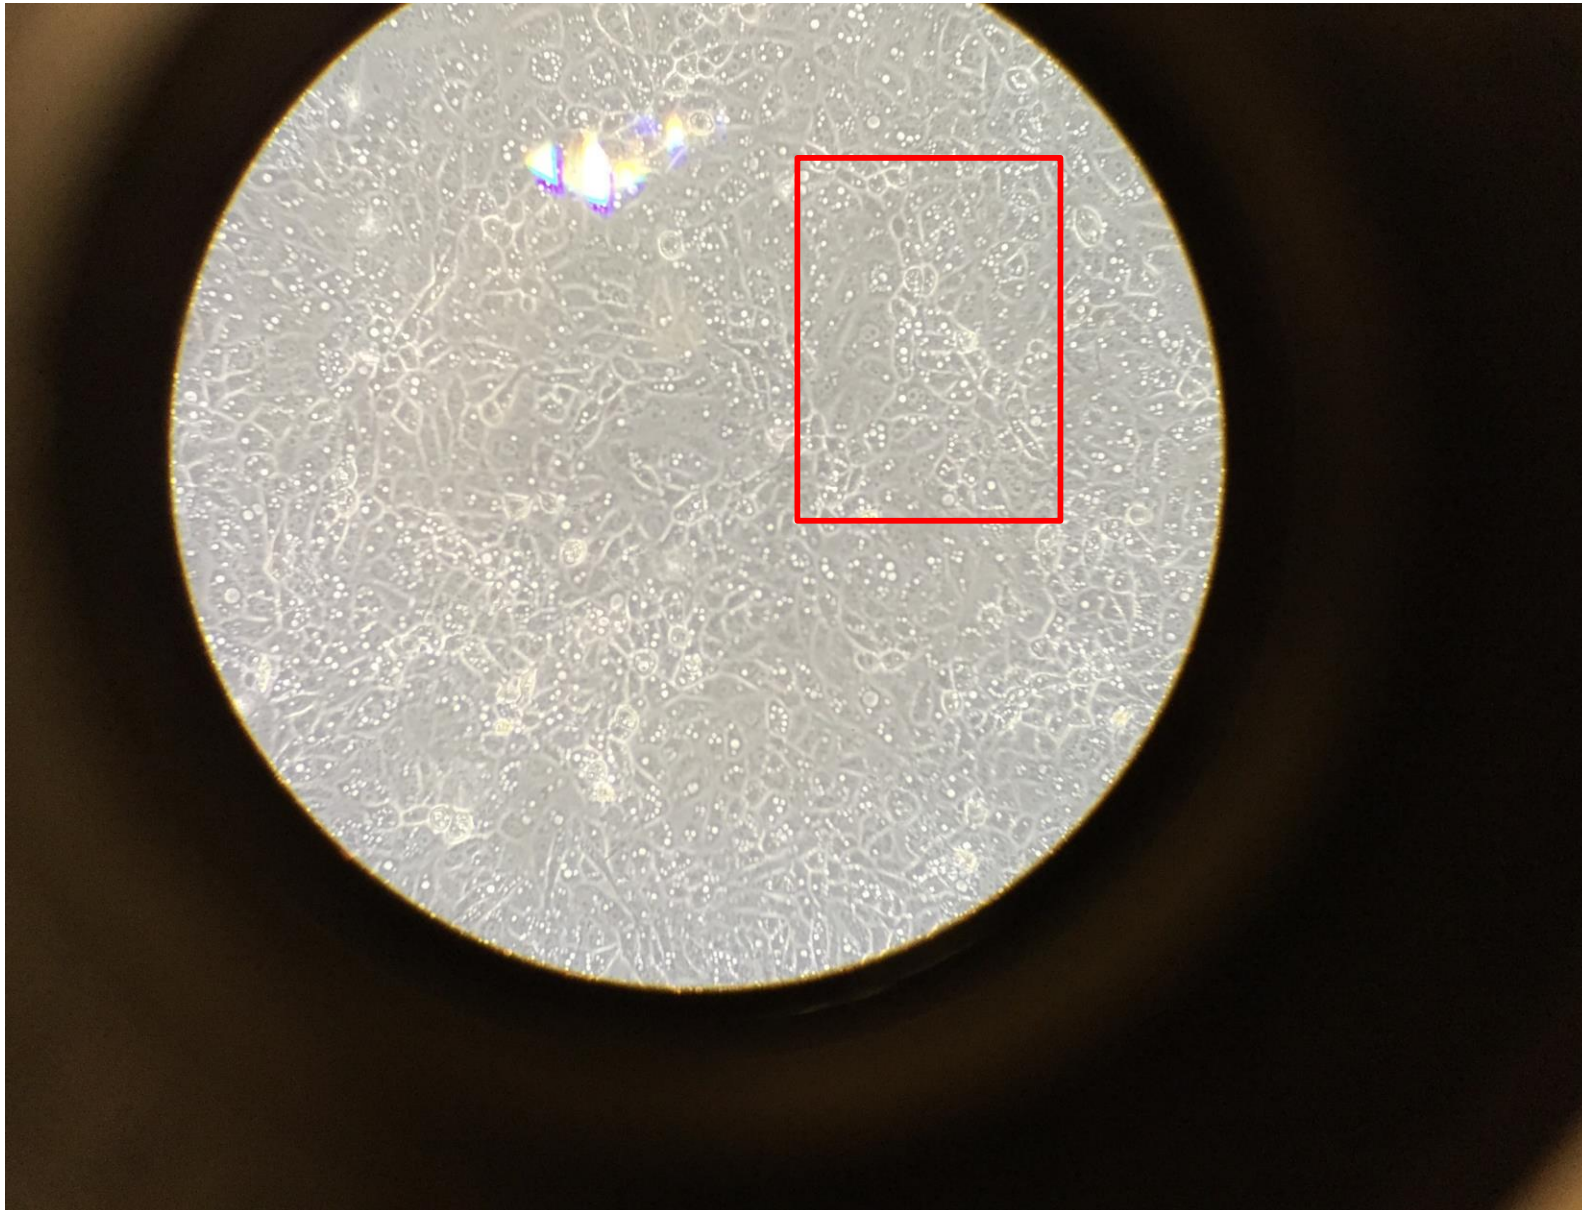

a3'

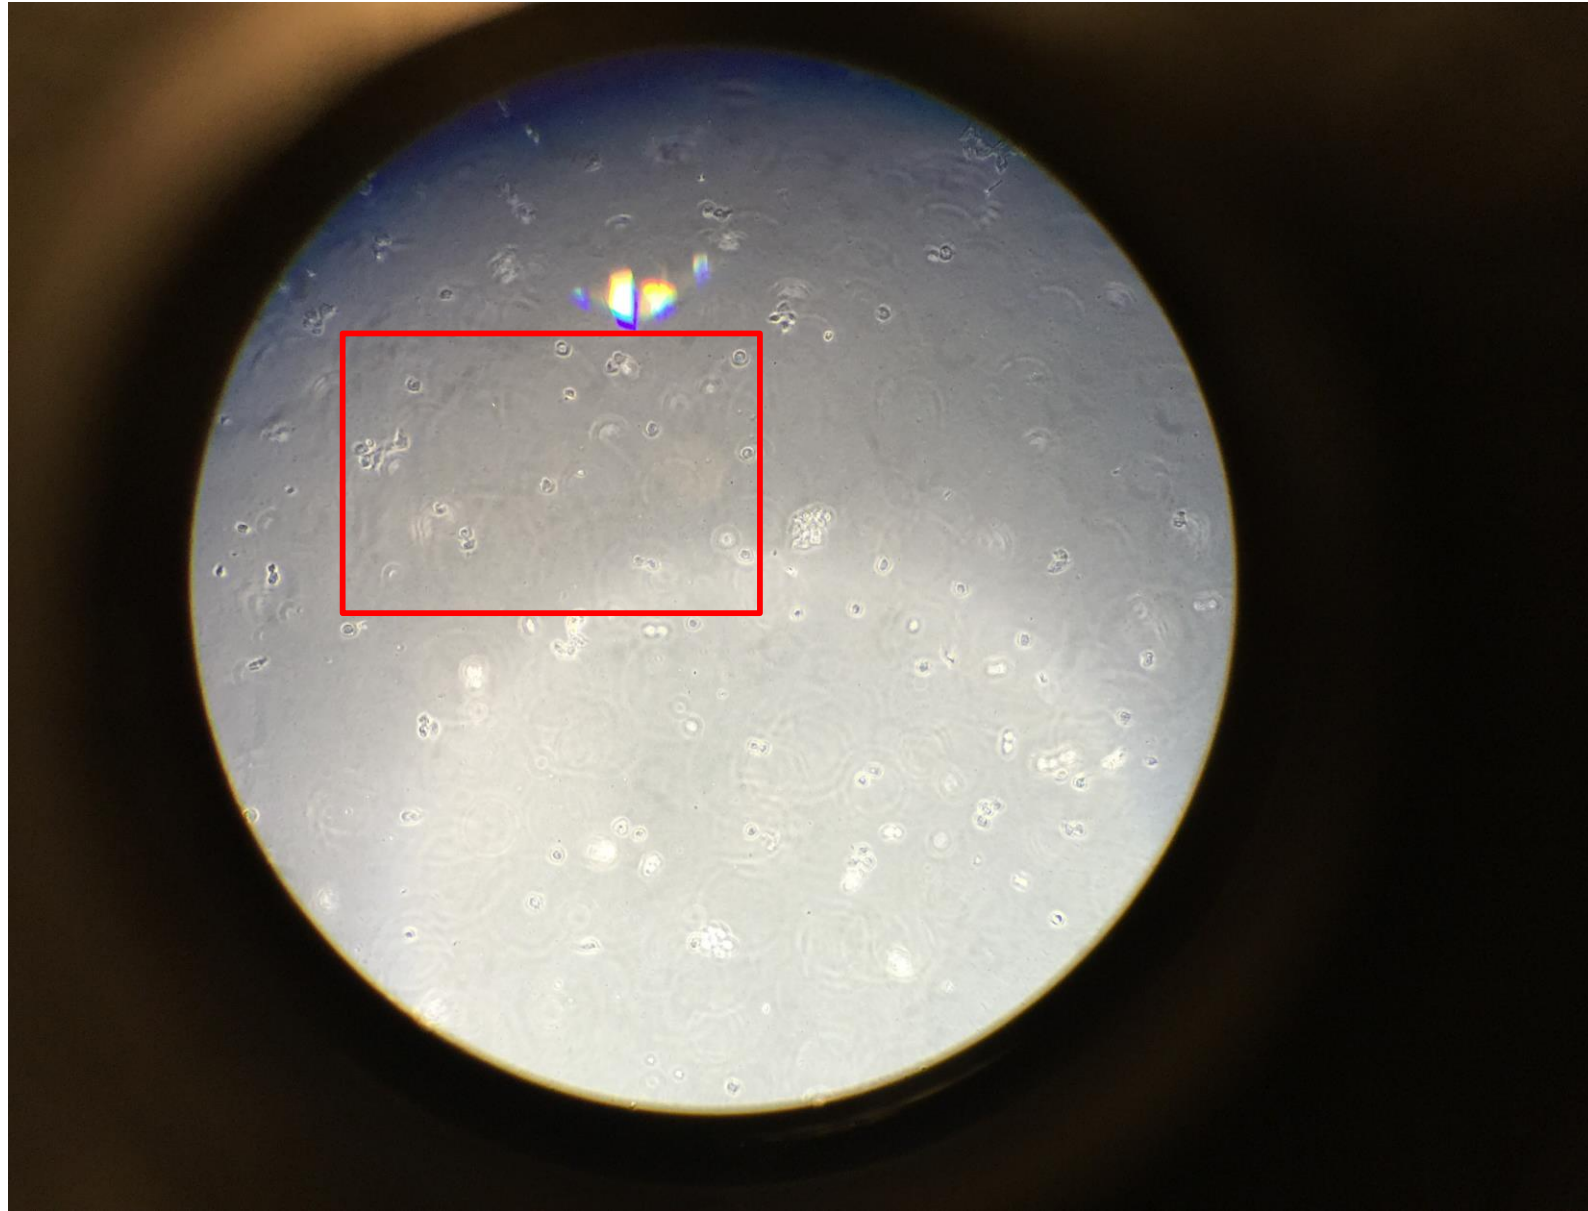

a4'

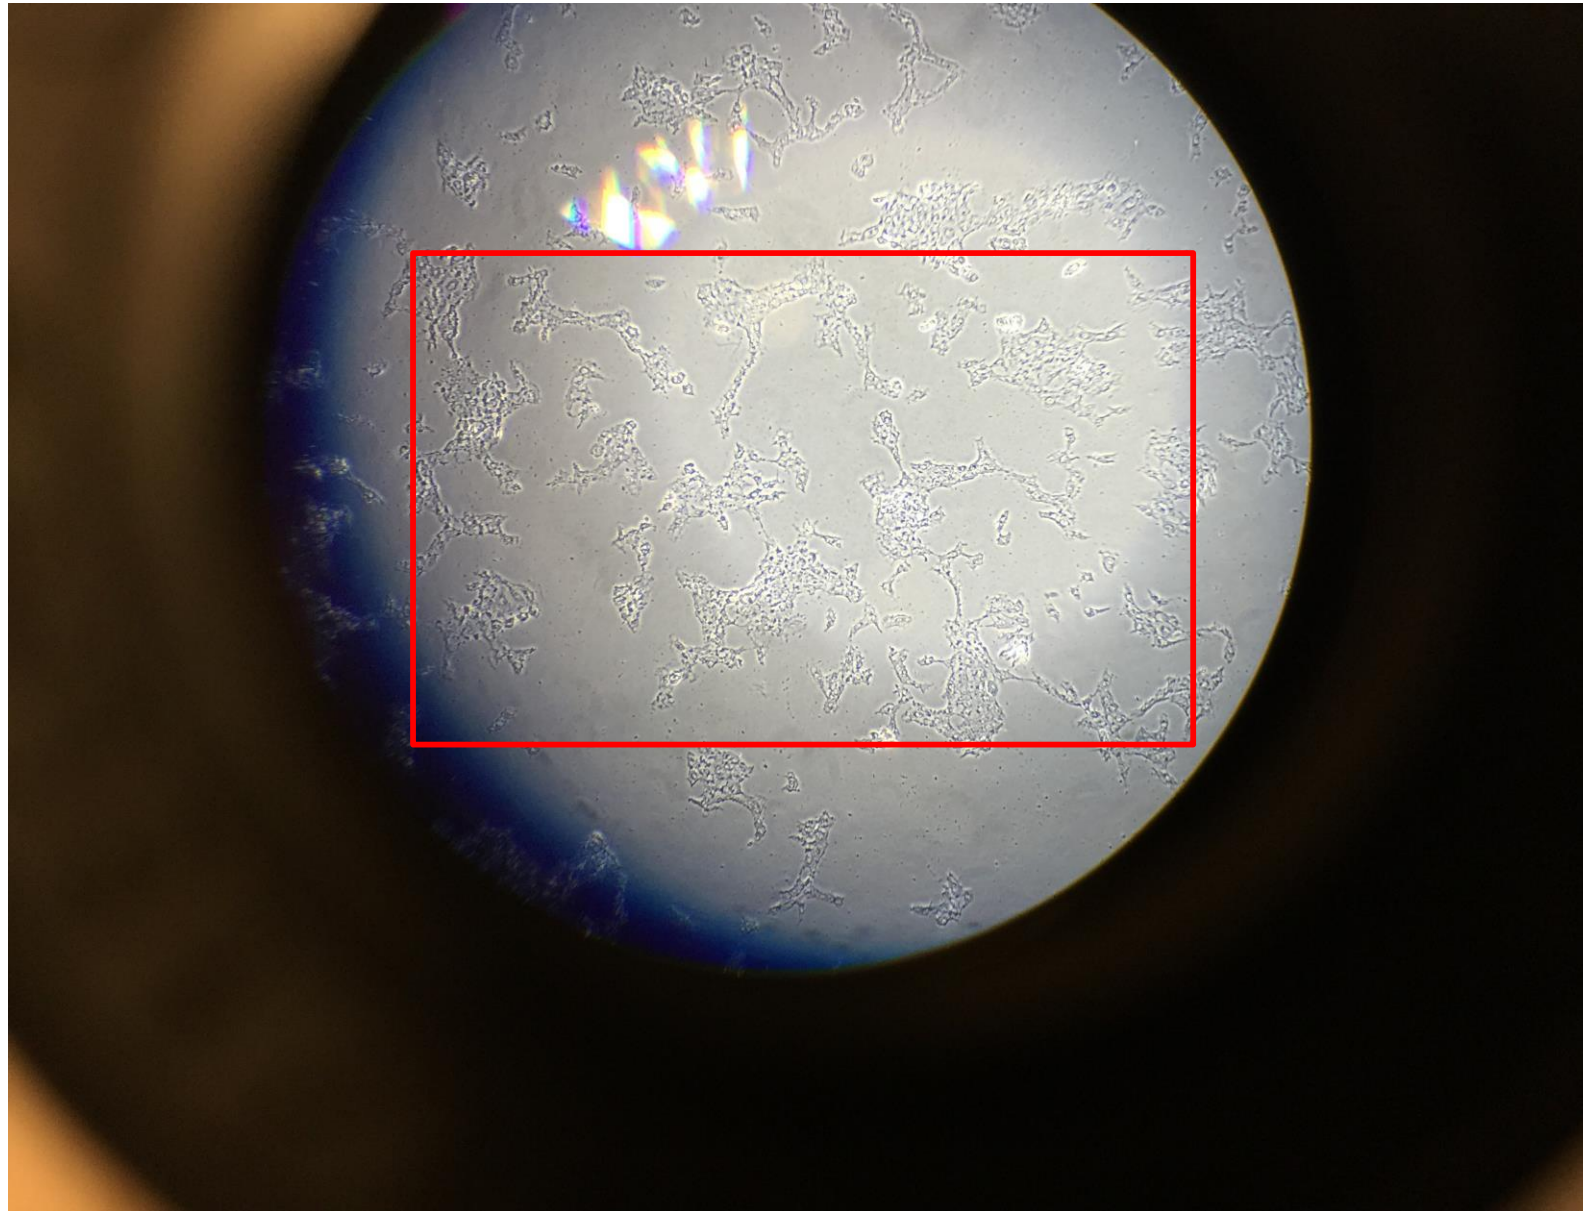



**b1**

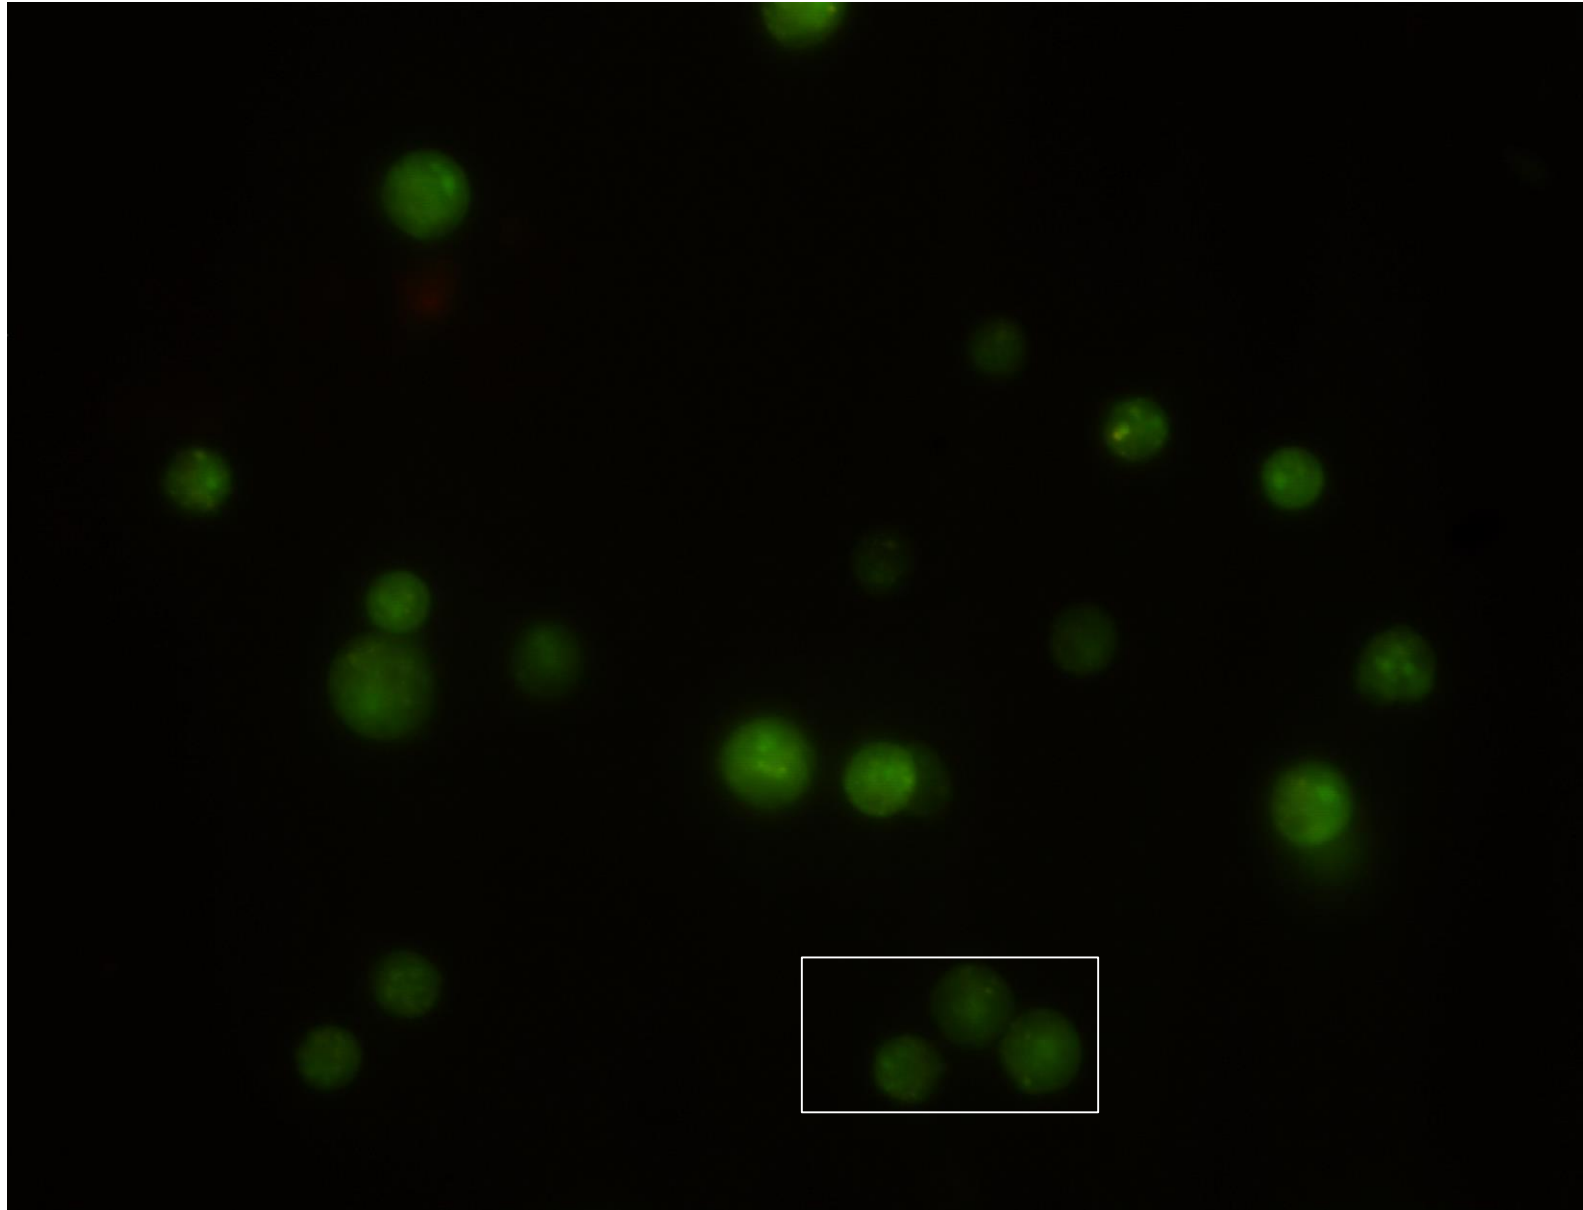

**b2**

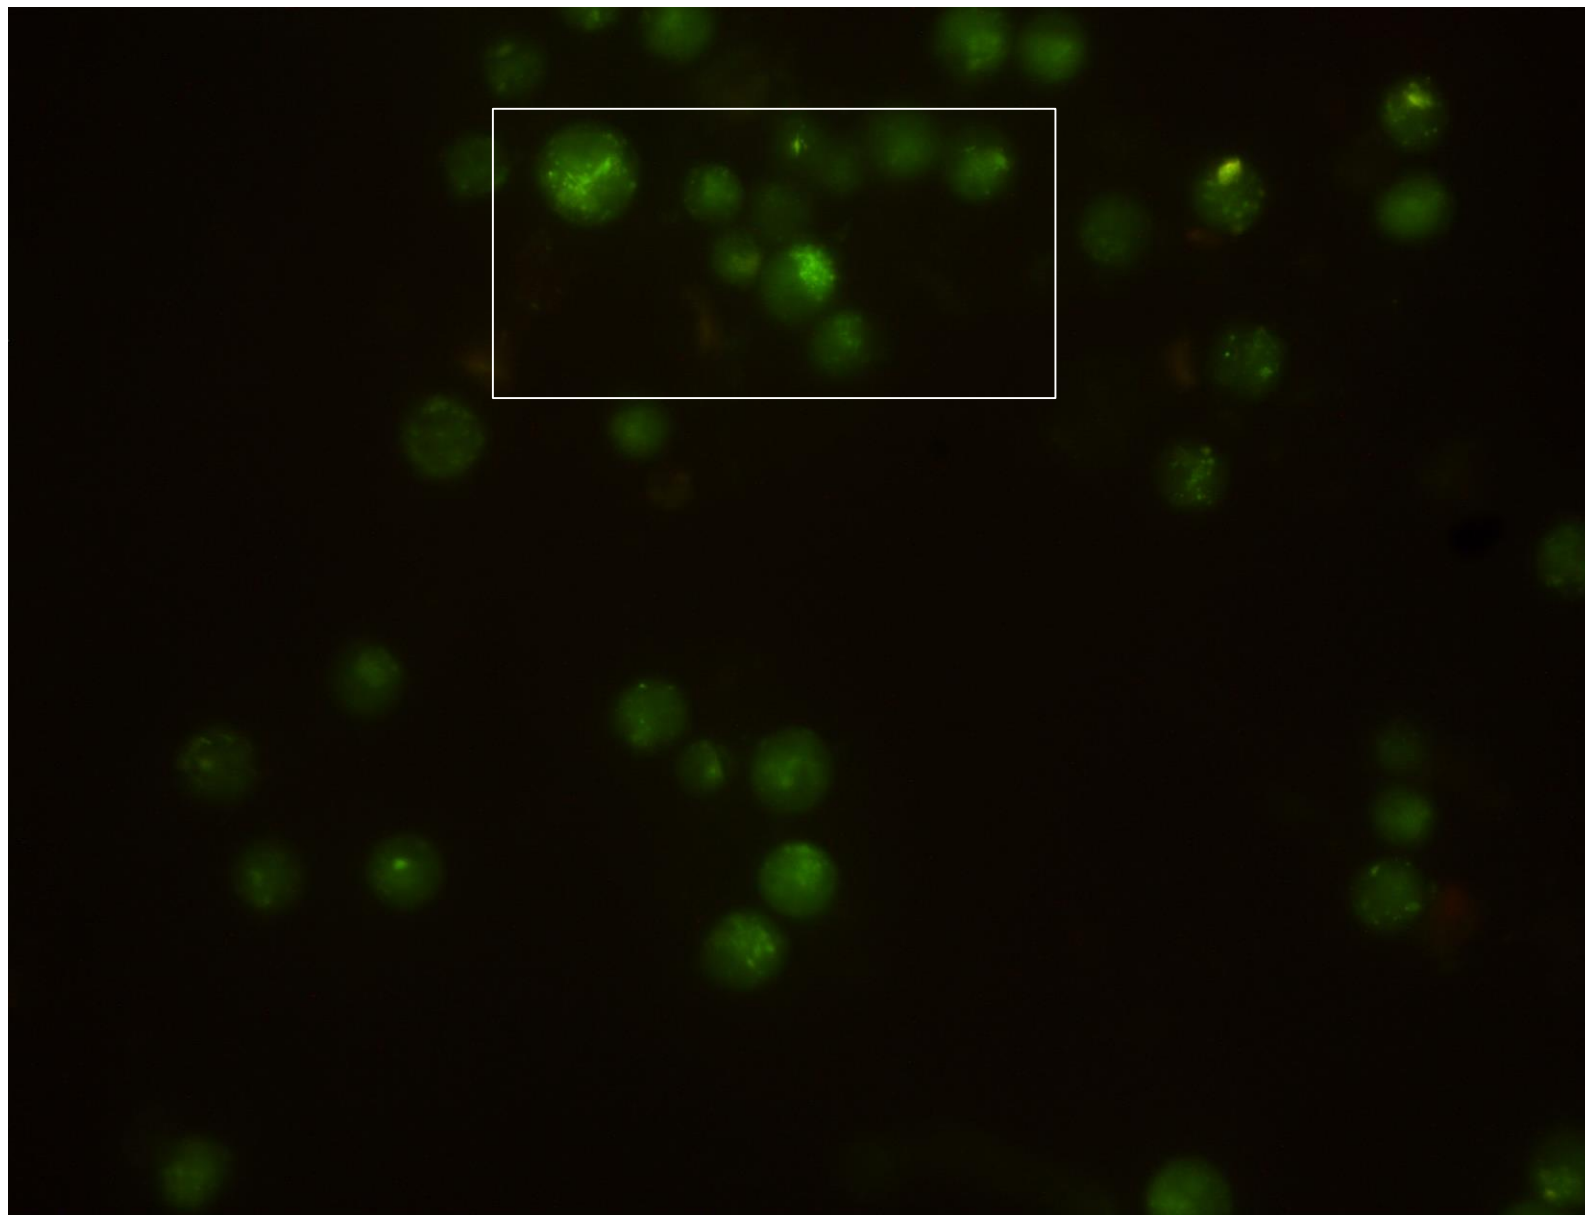

**b3**

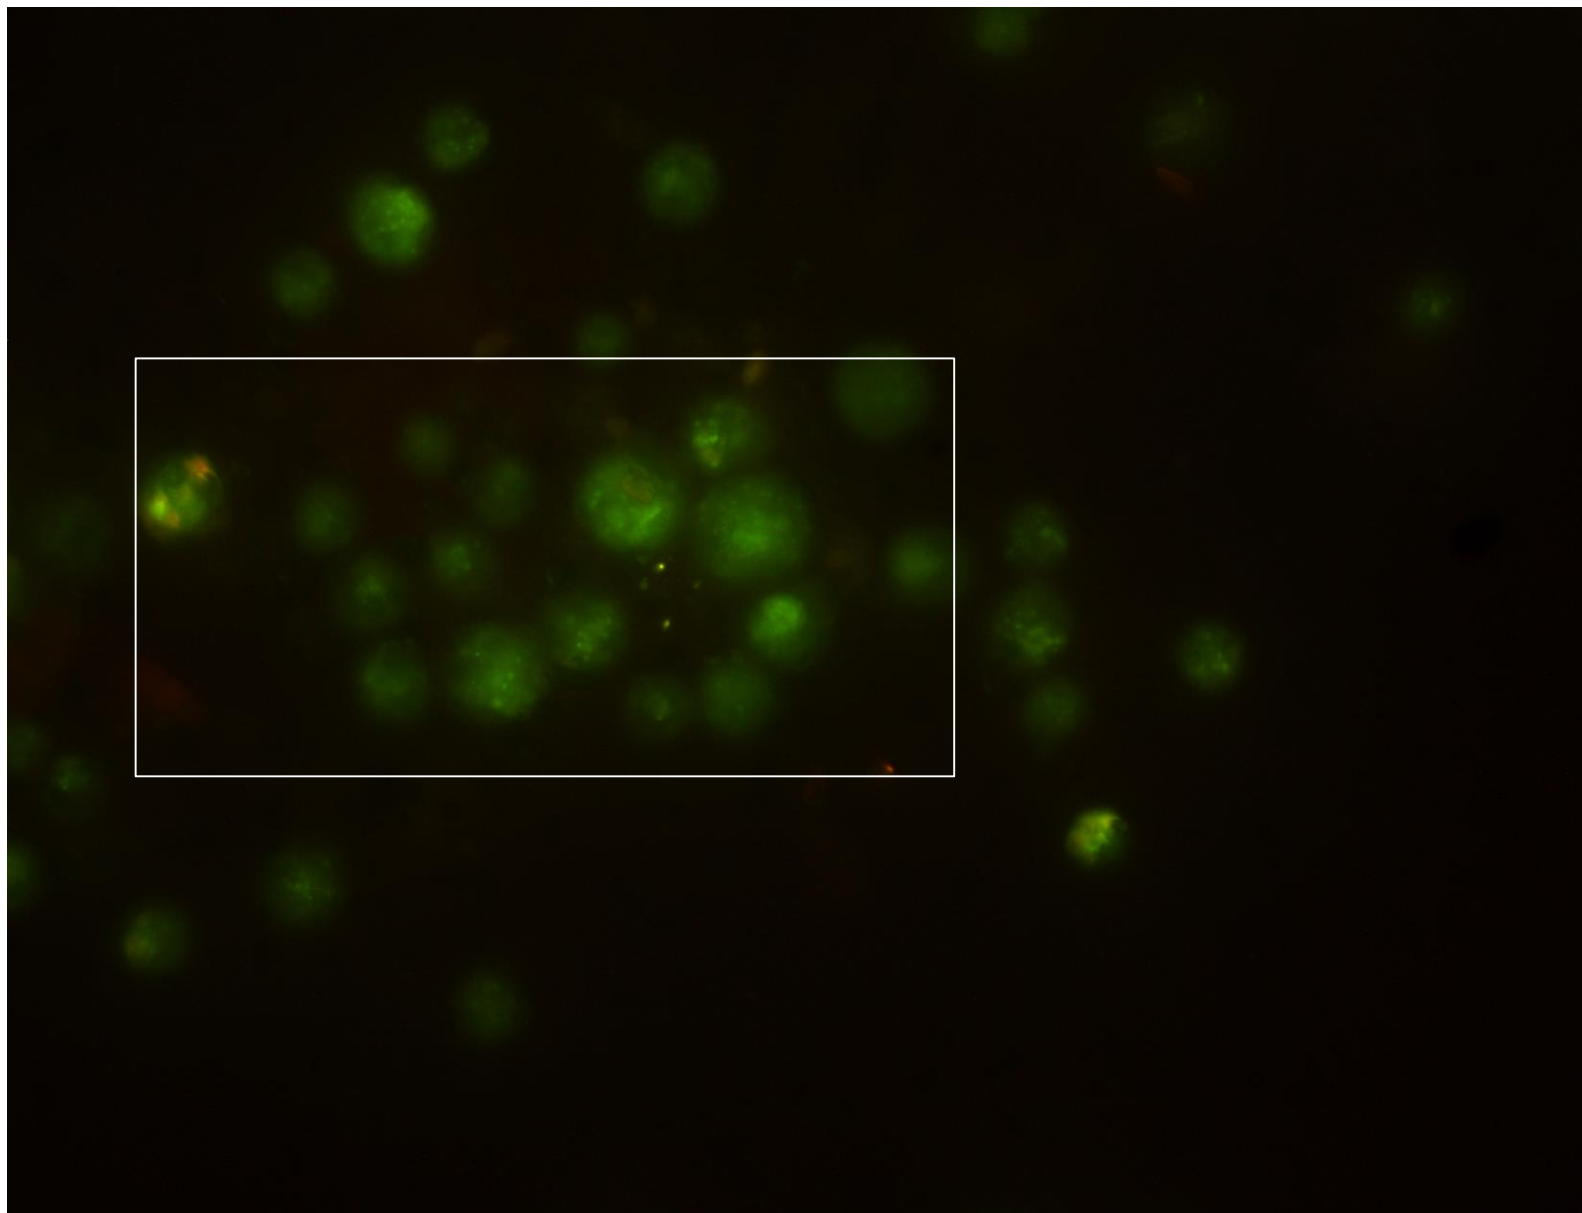

**b4**

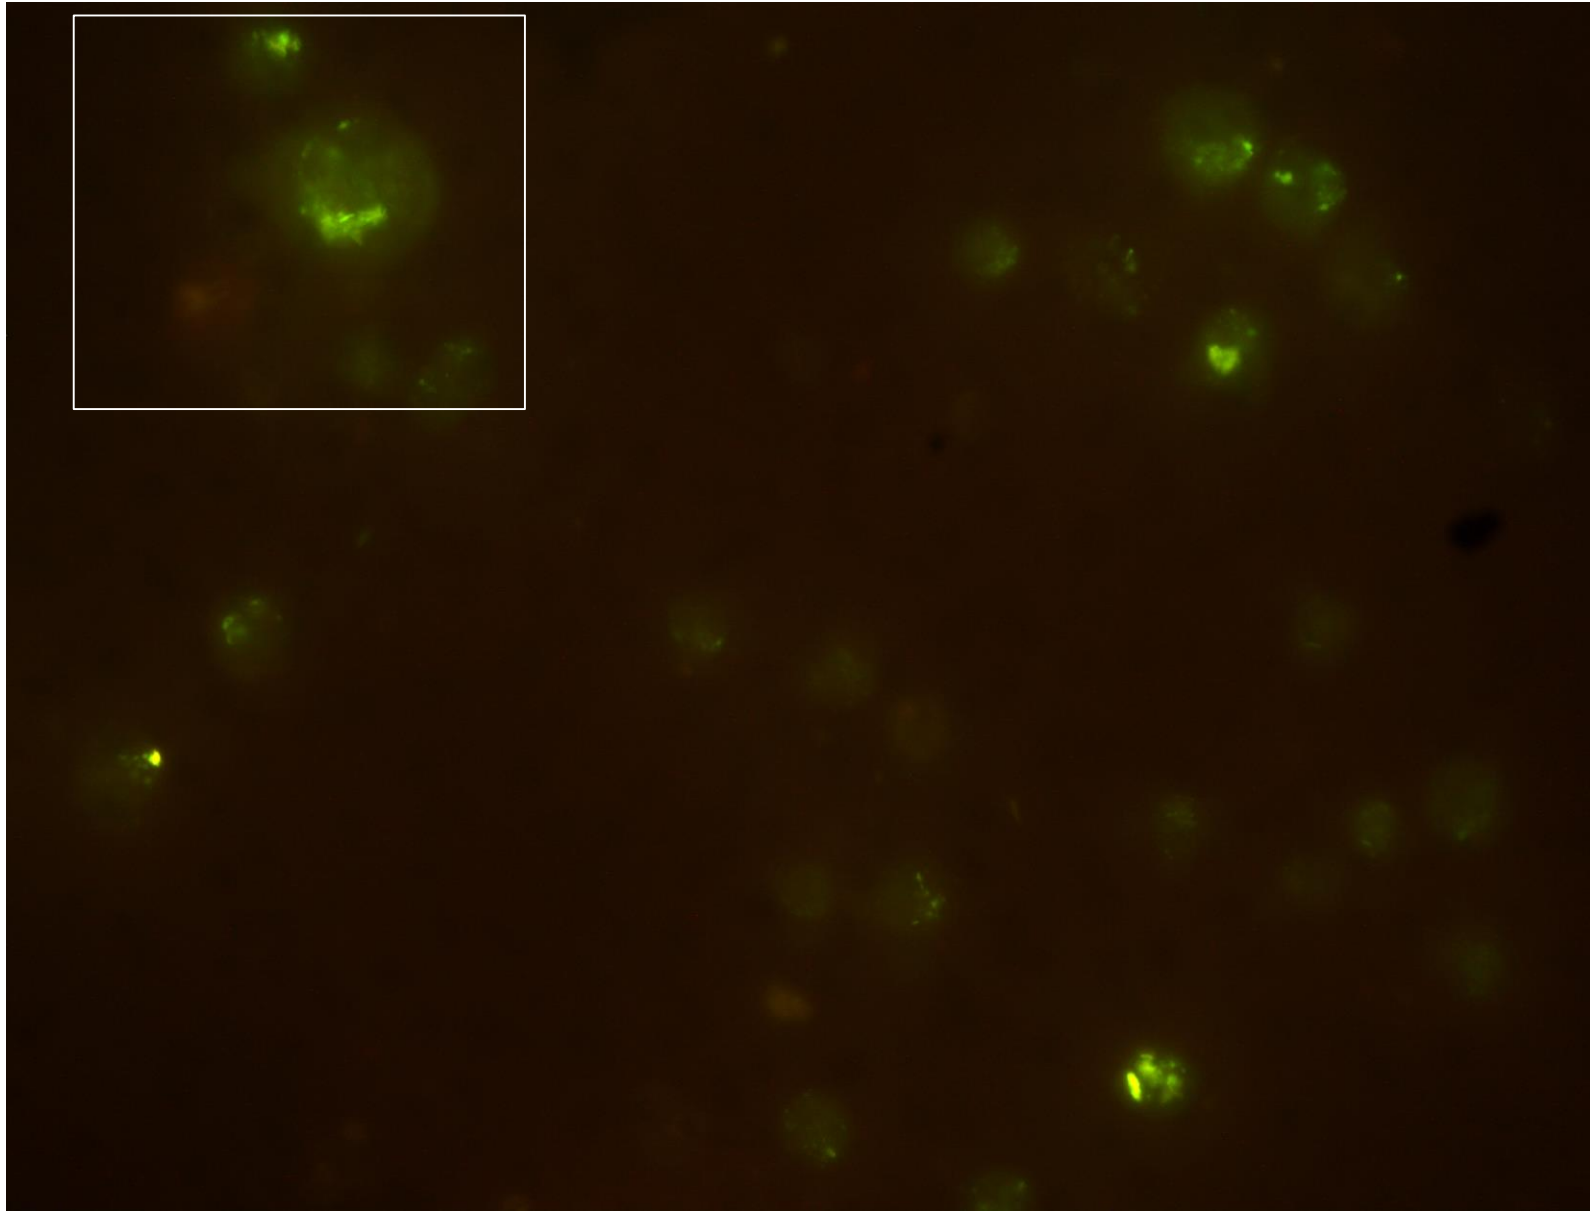

**b1'**

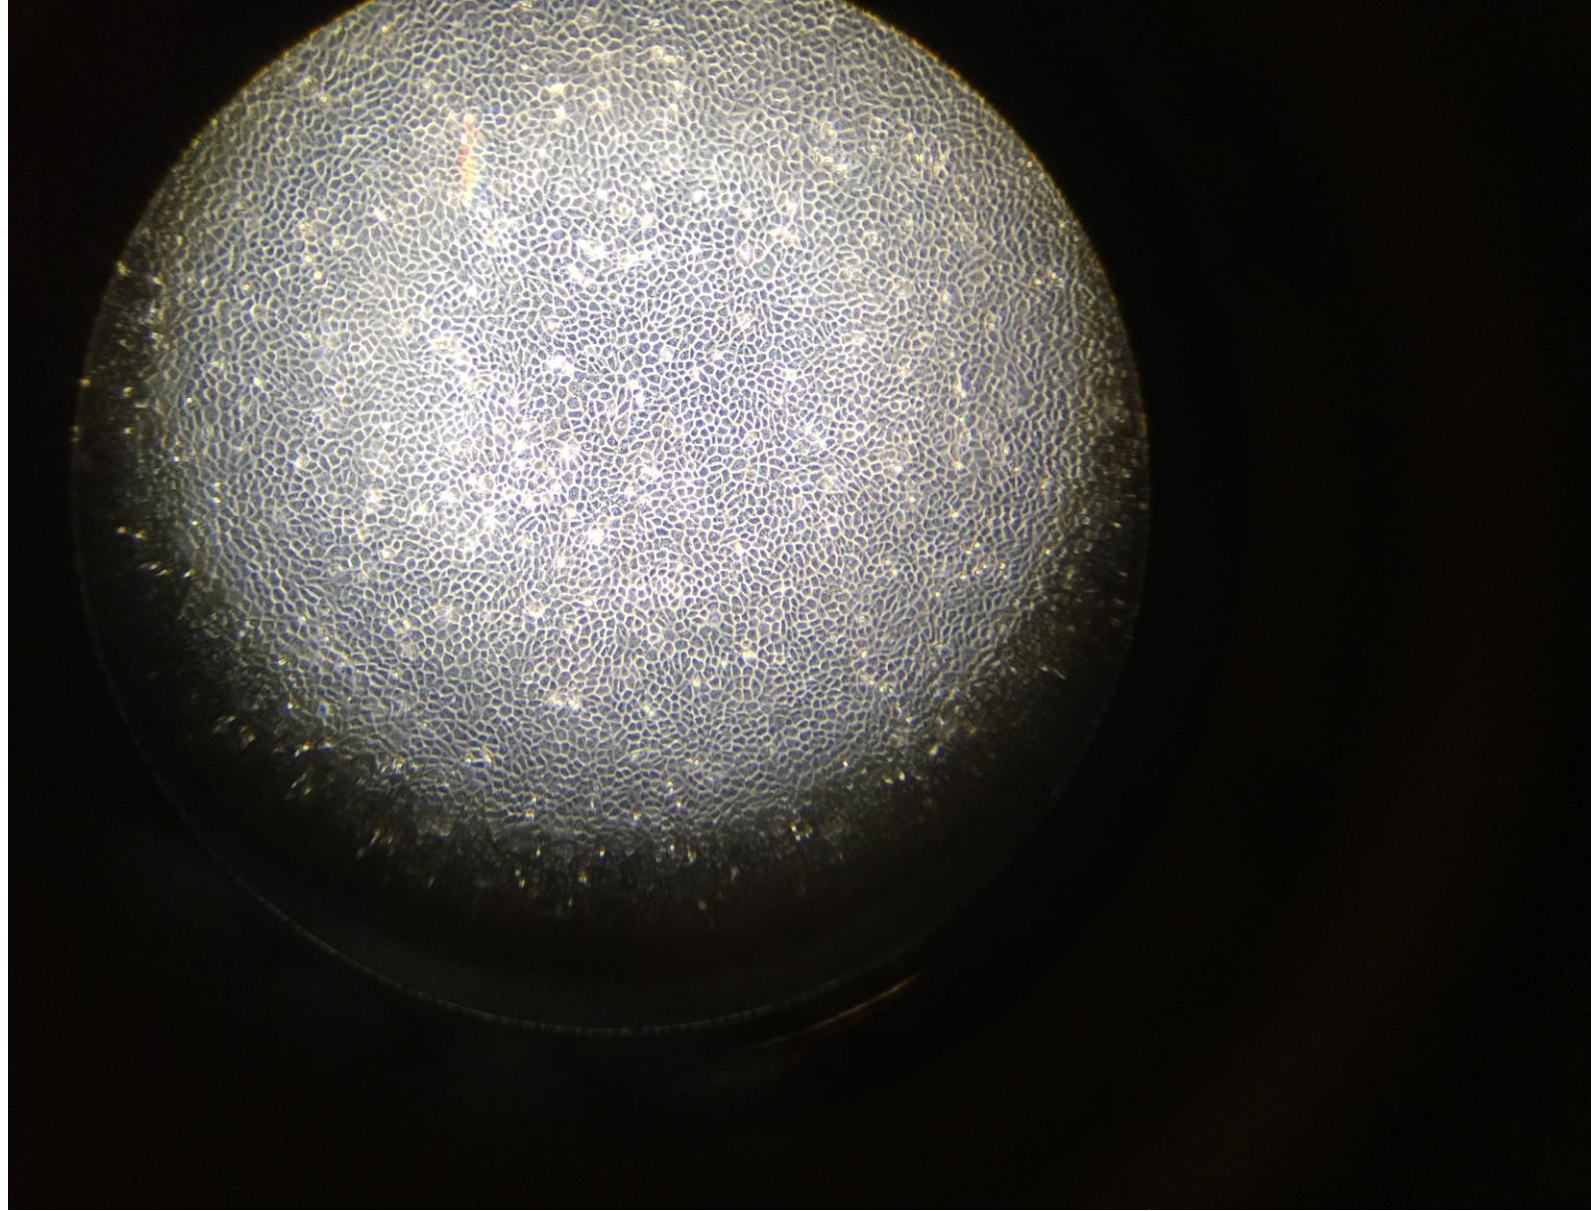

**b2'**

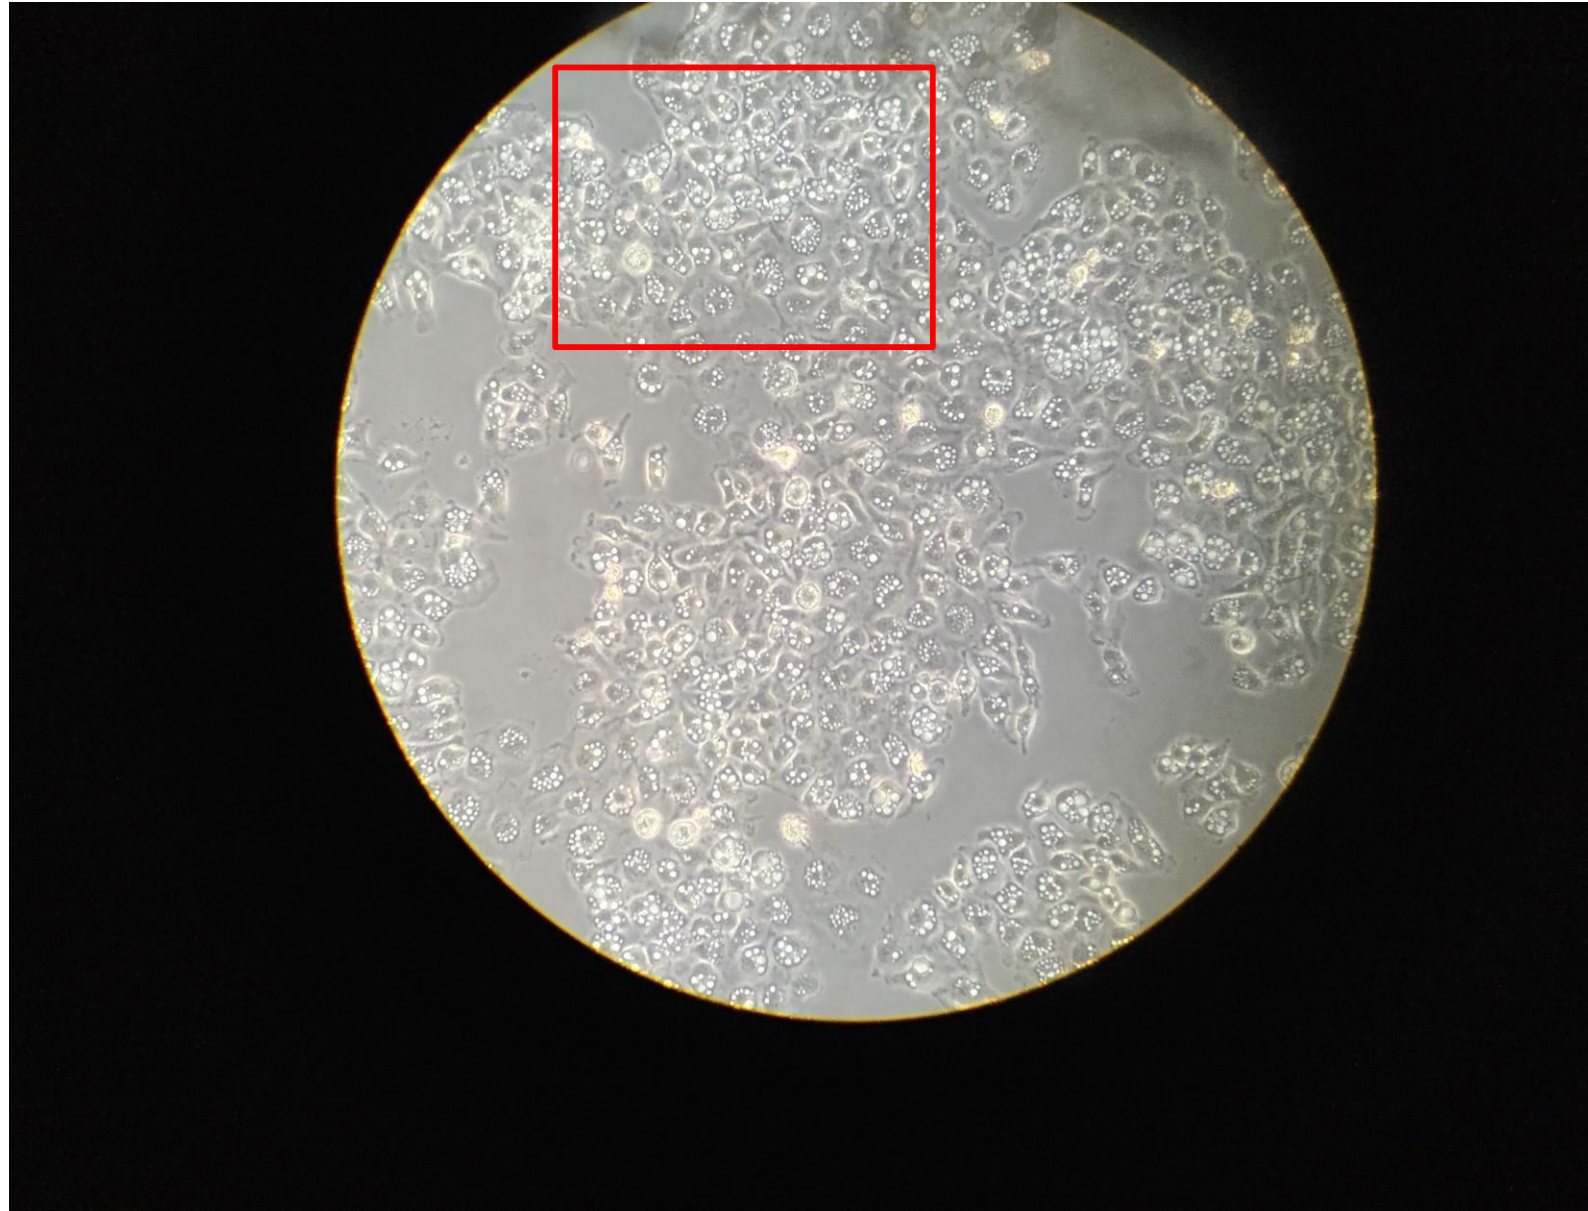

**b3'**

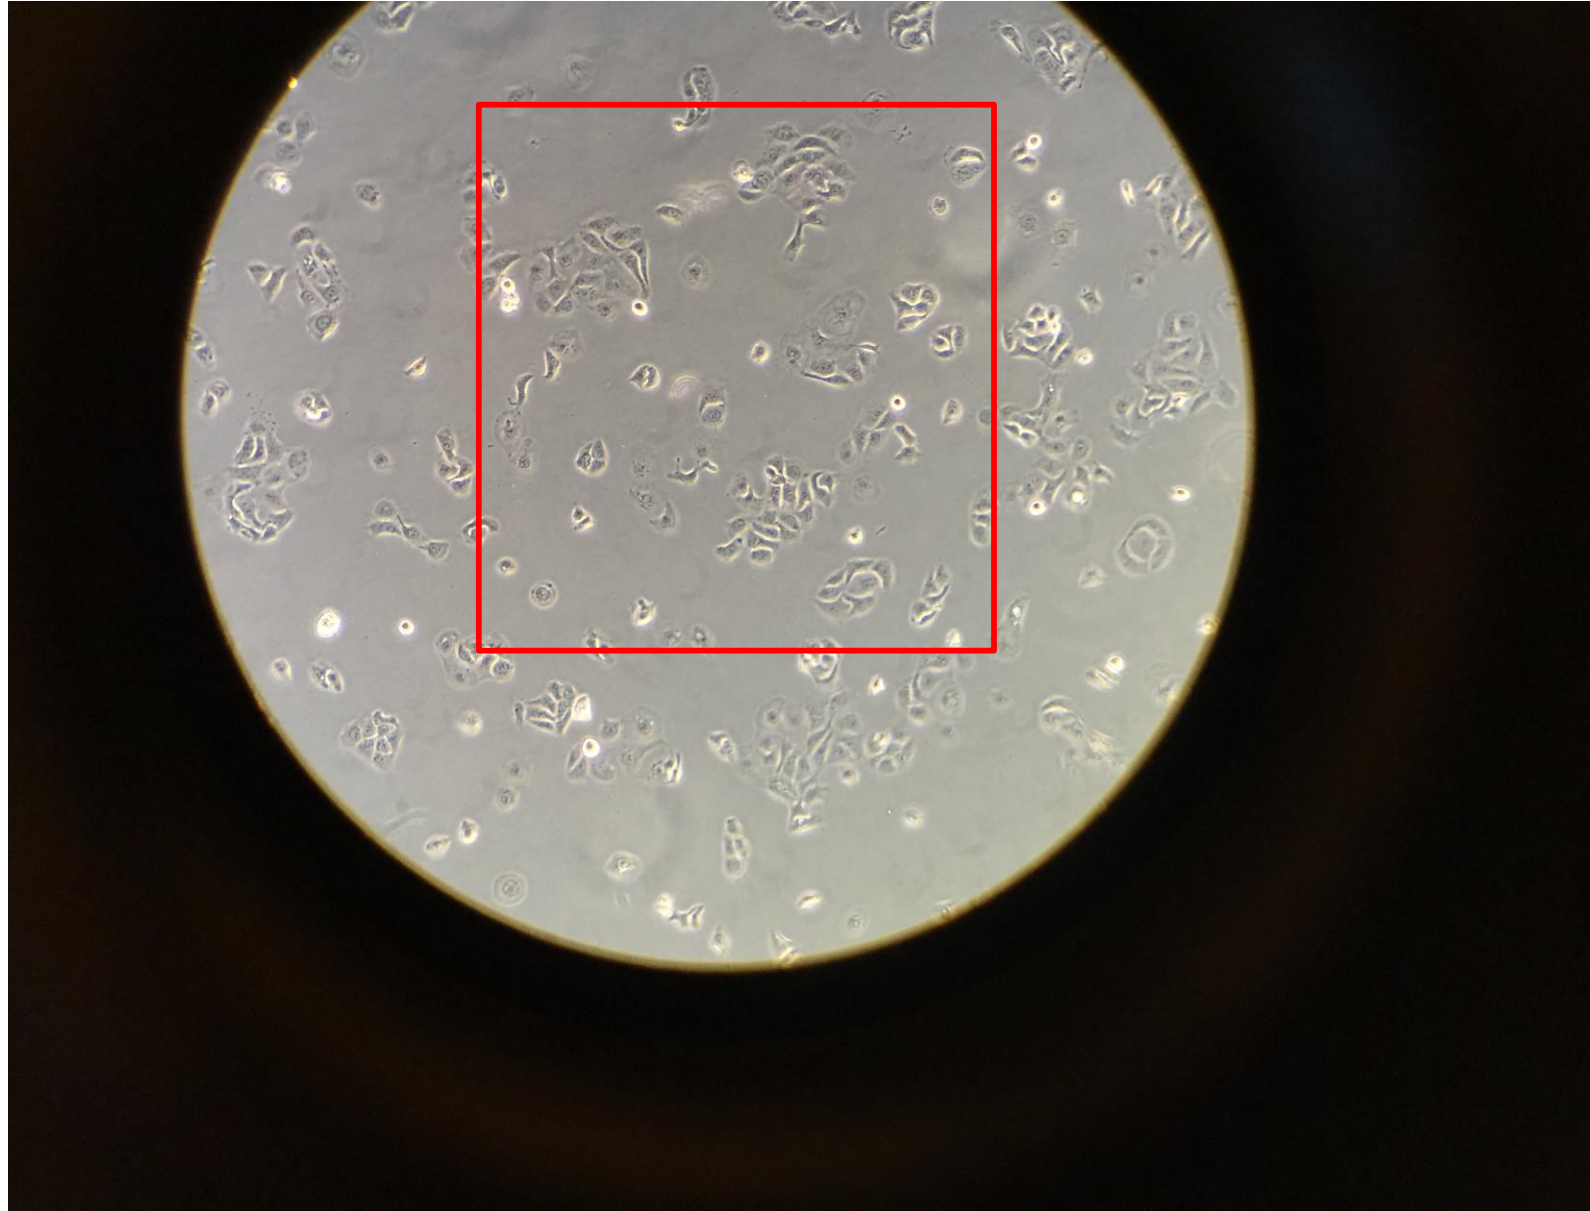

**b4'**

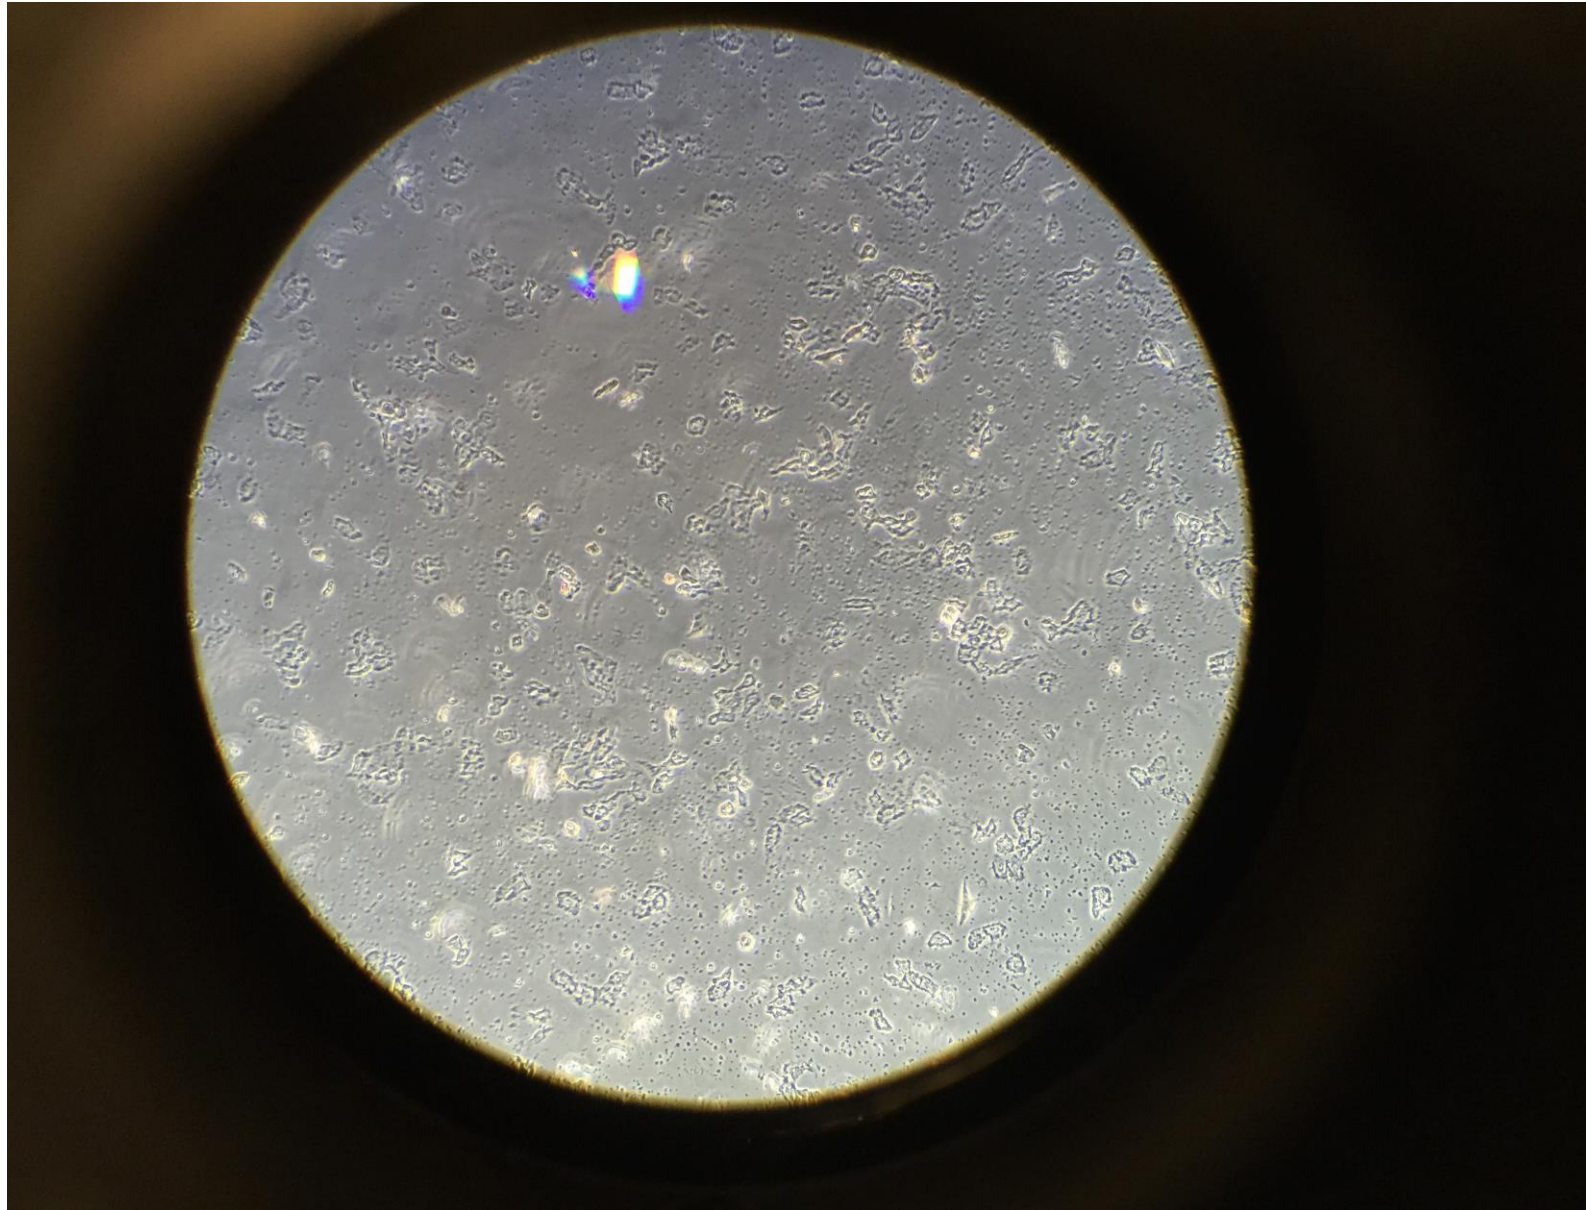



Figure 2 after correction

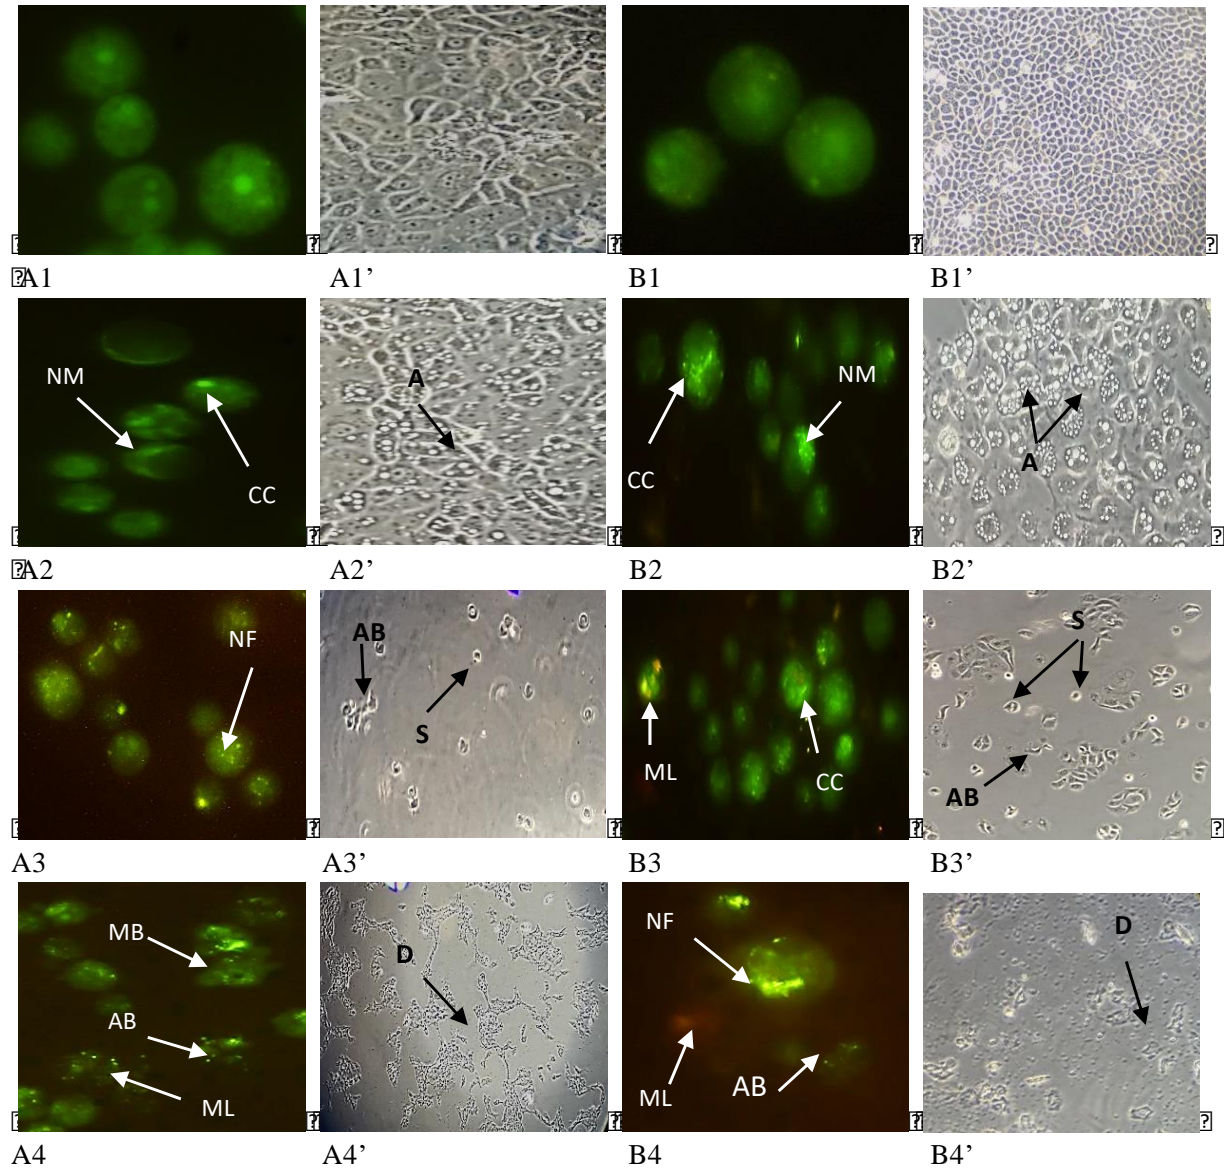

?

?

?

Supplement: f1 [file 1759479.f1.pdf]
